# Supplementary material for: Using earth abundant materials for long duration energy storage: electro-chemical and thermo-chemical cycling of bicarbonate/formate
Source: Royal Society of Chemistry journal article supplement (doi:10.1039/d3gc00219e), 2023-01-01
Supplement: d3gc00219e1.pdf [file d3gc00219e1.pdf]

## Supporting Information

### **Using earth abundant materials for long duration energy storage: electro-chemical and thermo-chemical cycling of bicarbonate/formate**

Oliver Y. Gutiérrez,<sup>1,\*</sup> Katarzyna Grubel,<sup>2</sup> Jotheeswari Kothandaraman,<sup>2</sup> Juan A. Lopez-Ruiz,<sup>2</sup>  
Kriston P. Brooks,<sup>2</sup> Mark E. Bowden,<sup>1</sup> Tom Autrey<sup>1</sup>

<sup>1</sup> Physical and Computational Sciences Directorate, Pacific Northwest National Laboratory, 902  
Battelle Blvd., Richland, WA 99354, USA

<sup>2</sup> Energy and Environment Directorate, Pacific Northwest National Laboratory, 902 Battelle  
Blvd., Richland, WA 99354, USA

\* [oliver.gutierrez@pnnl.gov](mailto:oliver.gutierrez@pnnl.gov)

### Illustration of the thermocatalytic bicarbonate–formate transformation

A simple experiment was performed to illustrate the convenience and simplicity of using alkali bicarbonate (baking soda) to store and release hydrogen using a carbon-supported Pd catalyst. Baking soda, purchased from the grocery store was used in place of reagent-grade sodium bicarbonate. Tap water from the laboratory sink was used in place of laboratory de-ionized water. This simple experiment demonstrated that both hydrogenation and hydrogen release will occur at rates comparable to the rates observed using reactant grade solutions. **Fig. S1** shows the direct readings of pressure and volume changes. Figure 5 in the main text shows the corresponding changes in hydrogen amounts. The experiment consisted of subsequent hydrogenation and dehydrogenation. The experimental details are as follows.

A 49 mL Parr autoclave was charged with 3 wt.% Pd/C (83.3 mg) and a volume (10 mL) of sodium bicarbonate solution at a given concentration (1M). Then the sealed reactor was pressurized with 40 bar H<sub>2</sub> and heated to 25 °C for 5 h. After the reaction, the autoclave was cooled to room temperature and the excess pressure was released slowly. Then the subsequent dehydrogenation was performed after reheating the reaction mixture to 65 °C under isobaric conditions (1 atm). The evolved gas was passed through a NaOH trap to absorb the CO<sub>2</sub> and then through a flowmeter. The volume of the gas passed through the flowmeter was logged using the Labview software. After heating the reactor for a given time, the reactor was cooled to room temperature.

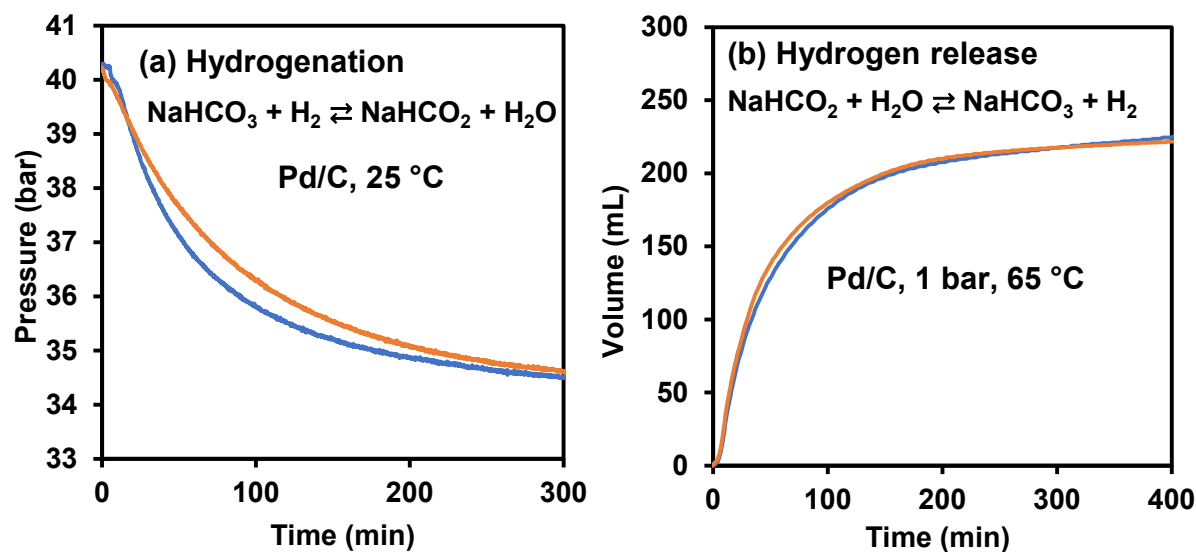

Figure S1. Thermochemical bicarbonate–formate cycle for hydrogen storage: (a) Blue line: reduction of 1M  $\text{NaHCO}_3$  in ultra-pure water in the presence of commercial 3wt.% Pd/C; orange line: hydrogenation of baking soda in sea water in the presence of commercial 3wt.% Pd/C catalyst. (b) Blue line: oxidation of in situ formed sodium formate from 1M  $\text{NaHCO}_3$  in ultra-pure water; orange line: oxidation of in situ formed sodium formate from baking soda in tap water. In both plots 100% represents the maximum amount of  $\text{H}_2$  that the system can uptake or release.
